# Supplementary material for: Long-term outcomes in ST-elevation myocardial infarction patients treated according to hospital visit time
Source: PubMed Central journal article supplement — Korean J Intern Med. 2021 Nov 16;37(3):605–17. doi: 10.3904/kjim.2021.204 (PMC9082432; doi:10.3904/kjim.2021.204), 2021-11-16
Supplement: kjim-2021-204-suppl.pdf [file kjim-2021-204-suppl.pdf]

**Supplementary Table 1. Short-term outcomes during index hospitalization, from 6,325 patients with a final diagnosis of ST-elevation myocardial infarction**

| Characteristic                                                             | Off-hours group<br>(n = 3,725) | On-hours group<br>(n = 2,600) | p value |
|----------------------------------------------------------------------------|--------------------------------|-------------------------------|---------|
| In-hospital decease or hopeless discharge                                  | 218 (5.85)                     | 134 (5.15)                    | 0.233   |
| In-hospital decease                                                        | 206 (5.53)                     | 122 (4.69)                    | 0.139   |
| No any revascularization or failed PCI                                     | 141 (3.79)                     | 108 (4.15)                    | 0.458   |
| Thrombolysis                                                               | 114 (3.06)                     | 15 (0.58)                     | < 0.001 |
| In-hospital complications                                                  |                                |                               |         |
| Cardiogenic shock                                                          | 512 (13.74)                    | 311 (11.96)                   | 0.038   |
| New-onset heart failure                                                    | 165 (4.43)                     | 102 (3.92)                    | 0.324   |
| Reoccur MI                                                                 | 21 (0.56)                      | 15 (0.58)                     | 0.945   |
| ST                                                                         | 18 (0.48)                      | 15 (0.57)                     | 0.611   |
| Any CVA                                                                    | 61 (1.64)                      | 56 (2.15)                     | 0.134   |
| Bleeding complications<br>(Hgb decrease by 5 g/dL or Hct decrease by 15 %) | 48 (1.29)                      | 51 (1.96)                     | 0.034   |
| Atrioventricular block                                                     | 138 (3.70)                     | 102 (3.92)                    | 0.655   |
| Ventricular tachycardia or fibrillation                                    | 308 (8.27)                     | 178 (6.85)                    | 0.037   |
| Atrial fibrillation                                                        | 145 (3.89)                     | 96 (3.69)                     | 0.682   |
| Acute kidney injury                                                        | 36 (0.97)                      | 27 (1.04)                     | 0.777   |
| Sepsis                                                                     | 25 (0.67)                      | 12 (0.46)                     | 0.282   |
| Multi-organ failure                                                        | 38 (1.02)                      | 18 (0.69)                     | 0.171   |
| Supportive treatment                                                       |                                |                               |         |
| CPR                                                                        | 362 (9.72)                     | 203 (7.81)                    | 0.009   |
| Percutaneous ventricular mechanical support devices                        |                                |                               |         |
| IABP                                                                       | 195 (5.23)                     | 121 (4.65)                    | 0.297   |
| ECMO                                                                       | 68 (1.83)                      | 41 (1.58)                     | 0.455   |
| Any defibrillation                                                         | 259 (6.95)                     | 149 (5.73)                    | 0.052   |
| Permanent pacemaker implantation                                           | 6 (0.16)                       | 2 (0.08)                      | 0.484   |
| ICD                                                                        | 1 (0.02)                       | 5 (0.19)                      | 0.046   |
| CABG                                                                       | 21 (0.56)                      | 15 (0.58)                     | 0.945   |

Values are presented as number (%).

PCI, percutaneous coronary intervention; MI, myocardial infarction; ST, stent thrombosis; CVA, cerebrovascular accident; Hgb, hemoglobin; Hct, hematocrit; CPR, cardiopulmonary resuscitation; IABP, intra-aortic balloon pump; ECMO, extracorporeal membrane oxygenation; ICD, implantable cardiac defibrillator; CABG, coronary artery bypass graft.
